# Supplementary material for: Effects of Terrestrial Inputs on Mesozooplankton Community Structure in Bohai Bay, China
Source: MDPI journal article supplement (doi:10.3390/d14050410), 2022-05-22
Supplement: s1 [file s1]

## Supplementary material

Table S1. Environmental parameters and diversity parameters of Bohai Bay. (min, max and mean  $\pm$  SD).

|                                   | Summer |          |         |         | Autumn |          |         |         |
|-----------------------------------|--------|----------|---------|---------|--------|----------|---------|---------|
|                                   | Min    | Max      | Mean    | SD      | Min    | Max      | Mean    | SD      |
| Temperature (°C)                  | 23.44  | 28.56    | 27.17   | 1.31    | 13.39  | 17.32    | 15.36   | 0.98    |
| Salinity                          | 23.44  | 32.15    | 30.67   | 2.13    | 6.63   | 31.82    | 29.04   | 6.07    |
| pH                                | 7.77   | 8.24     | 8.05    | 0.12    | 7.70   | 8.71     | 8.23    | 0.23    |
| DO (mg/L)                         | 2.87   | 8.95     | 7.16    | 1.33    | 6.62   | 10.50    | 8.44    | 1.06    |
| Chl <i>a</i> (µg/L)               | 2.72   | 25.16    | 10.96   | 6.01    | 1.51   | 84.89    | 18.91   | 25.65   |
| DIP (µmol/L)                      | 0.12   | 1.10     | 0.32    | 0.26    | 0.03   | 2.25     | 0.29    | 0.50    |
| DSi (µmol/L)                      | 0.30   | 10.04    | 2.77    | 2.34    | 0.80   | 5.85     | 3.12    | 1.77    |
| DIN (µmol/L)                      | 1.05   | 24.00    | 11.43   | 7.29    | 1.00   | 78.92    | 12.18   | 17.63   |
| Shannon–Wiener diversity index    | 0.28   | 2.53     | 1.74    | 0.59    | 1.25   | 2.16     | 1.76    | 0.26    |
| Pielou’s evenness index           | 0.08   | 0.54     | 0.41    | 0.11    | 0.38   | 0.59     | 0.48    | 0.05    |
| Species richness                  | 7.00   | 29.00    | 18.88   | 6.86    | 7.00   | 21.00    | 13.89   | 4.15    |
| Abundance (ind. m <sup>-3</sup> ) | 299.00 | 28219.47 | 4967.18 | 7807.98 | 685.11 | 10807.00 | 4199.71 | 3034.98 |

Table S2. List of zooplankton species in Bohai Bay

| Group        | Species                          |
|--------------|----------------------------------|
| Amphipoda    | <i>Hyale grandicornis</i>        |
|              | <i>Sinoedicerus homopalmulus</i> |
| Chaetognatha | <i>Sagitta bipunctata</i>        |
|              | <i>Sagitta crassa</i>            |
|              | <i>Sagitta enflata</i>           |
|              | <i>Sagitta ferox</i>             |
|              | <i>Sagitta pulchra</i>           |
|              | <i>Sagitta robusta</i>           |
|              | <i>Zonosagitta nagae</i>         |
| Cladocera    | <i>Bosmina longirostris</i>      |
|              | <i>Chydorus sphaericus</i>       |
|              | <i>Moina micrura</i>             |
|              | <i>Penilia avirostris</i>        |
|              | <i>Pseudevadne tergestina</i>    |
| Copepoda     | <i>Acartia dance</i>             |
|              | <i>Acartia hongii</i>            |
|              | <i>Acartia negligens</i>         |
|              | <i>Acartia omorii</i>            |
|              | <i>Acartia omorii bradford</i>   |
|              | <i>Acartia pacifica</i>          |
|              | <i>Acartia pacifica steuer</i>   |
|              | <i>Acartia southwelli</i>        |
|              | <i>Acartia amboinensis</i>       |
|              | <i>Calanus sinicus</i>           |

|              |                                    |
|--------------|------------------------------------|
|              | <i>Calocalanus pavoninus</i>       |
|              | <i>Canthocalanus pauper</i>        |
|              | <i>Centropages abdominalis</i>     |
|              | <i>Centropages dorsispinatus</i>   |
|              | <i>Centropagrs dorsispinatus</i>   |
|              | <i>Cotycaeus affinis</i>           |
|              | <i>Ctennocalanus vanus</i>         |
|              | <i>Cyclops vicinus</i>             |
|              | <i>Eurytemora pacifica</i>         |
|              | <i>Halicyclois sinensis</i>        |
|              | <i>Halicyclops sinensis</i>        |
|              | <i>Labidocera euchaeta</i>         |
|              | <i>Mesocyclops leukarti</i>        |
|              | <i>Nannocalanus minor</i>          |
|              | <i>Oithona attenuata</i>           |
|              | <i>Oithona nana</i>                |
|              | <i>Oithona similis</i>             |
|              | <i>Paracalanus crassirostris</i>   |
|              | <i>Paracalanus parvus</i>          |
|              | <i>Pseudodiaptomus bulbosus</i>    |
|              | <i>Pseudodiaptomus marinus</i>     |
|              | <i>Thermocyclops kawamurai</i>     |
| Decapoda     | <i>Acetes chinensis</i>            |
|              | <i>Acetes japonicus</i>            |
|              | <i>Penaeus chinensis</i>           |
|              | <i>Penaeus japonicus</i>           |
| Euphausiacea | <i>Euphausia nana</i>              |
|              | <i>Euphausia pacifica</i>          |
|              | <i>Euphausia tenera</i>            |
|              | <i>Thysanoessa inermis</i>         |
| Hydromedusa  | <i>Aurelia aunrita</i>             |
|              | <i>Boaugainuillia britannica</i>   |
|              | <i>Clytia hemispherica</i>         |
|              | <i>Ectopleura dumortrieri</i>      |
|              | <i>Eirene menoni</i>               |
|              | <i>Helgicirrha malayensis</i>      |
|              | <i>Irene hexanemalis</i>           |
|              | <i>Livenella assimilis</i>         |
|              | <i>Malagazzia carolinae</i>        |
|              | <i>Nemopsis bathei</i>             |
|              | <i>Obelia</i> sp.                  |
|              | <i>Phialidium discoda</i>          |
|              | <i>Pleurobrachia globosa</i>       |
|              | <i>Podocoryne minima</i>           |
|              | <i>Rathkea octopunctata</i>        |
|              | <i>Sugiura chengshanense</i>       |
|              | <i>Tiaropsis multicirrata</i>      |
|              | <i>Turritopsis nutricula</i>       |
|              | <i>Uaritentaculata yantaiensis</i> |

|                |                                     |
|----------------|-------------------------------------|
| Mysidacea      | <i>Acanthomysis longirostris</i>    |
|                | <i>Neomysis intermedia</i>          |
|                | <i>Orientomysis aspera</i>          |
|                | <i>Siriella thompsoni</i>           |
|                | <i>Tenagomysis orientalis</i>       |
| Tunicate       | <i>Oikopirura dioica</i>            |
| Ostracoda      | <i>Cypridina acuminata</i>          |
| Pelagic larvae | Argyrotheca trochophora             |
|                | Balanus larva                       |
|                | Bipinnaria larva                    |
|                | Bivalve larvae                      |
|                | Bivalve larve                       |
|                | Brachyura zoea larva                |
|                | Calytopis larva                     |
|                | Copepodite larva                    |
|                | Doliolum miilleri larva             |
|                | Echinopluteus larva                 |
|                | Fish eggs                           |
|                | Fish larva                          |
|                | Gastropoda larva                    |
|                | Mysidacea larva                     |
|                | Nauplius larva                      |
|                | Neptunus trituberculatus zoea larva |
|                | Ophiopluteus larva                  |
|                | Polychaeta larva                    |
|                | Porcellana zoea larva               |
|                | Portunus pelagicus larva            |
|                | Squilla oratoria larva              |
|                | Tornaria larva                      |
|                | Veliger larva                       |
| Polychaeta     | <i>Alciopina parasitica</i>         |

Table S3. Group abundance (ind. m<sup>-3</sup>) at each station in summer

| Station | Chaetognatha | Cladocera | Copepoda | Hydromedusa | Pelagic larvae | Polychaeta | others |
|---------|--------------|-----------|----------|-------------|----------------|------------|--------|
| B1      | 157.00       | —         | 135.00   | —           | —              | —          | 7.00   |
| B2      | 192.50       | —         | 1634.50  | 50.50       | 461.00         | 22.00      | 28.50  |
| B4      | 63.33        | —         | 611.11   | 392.22      | 834.44         | 0.56       | 113.33 |
| B5      | 159.62       | 230.77    | 847.69   | 425.77      | 739.92         | 115.38     | —      |
| B6      | 287.10       | 10928.69  | 7423.95  | 166.00      | 9028.95        | 15.26      | 4.47   |
| B8      | 139.55       | 90.91     | 90.91    | 2.82        | 2101.36        | —          | 45.45  |
| B9      | 141.00       | —         | 8.50     | 54.00       | 705.00         | 5.00       | 6.00   |
| B10     | 327.00       | —         | 16.00    | 20.00       | 28.00          | —          | —      |
| B11     | 542.22       | 111.11    | 977.22   | 12.78       | 4622.22        | —          | —      |
| B12     | 0.71         | —         | 144.29   | —           | 216.43         | —          | 242.86 |
| B14     | 1.36         | —         | 282.73   | 0.45        | 681.82         | —          | 45.91  |
| B16     | 26.83        | —         | 9525.00  | 122.67      | 11472.00       | 83.33      | 5.00   |
| B17     | 8.07         | 35.71     | 1901.07  | 124.29      | 4438.57        | —          | 36.07  |
| B19     | 89.86        | 253.18    | 500.00   | 348.65      | 491.14         | —          | 113.64 |
| H2      | 1.25         | —         | 125.00   | 252.50      | 425.31         | —          | —      |

|    |      |         |        |      |         |   |       |
|----|------|---------|--------|------|---------|---|-------|
| H4 | 8.33 | —       | 194.44 | 0.56 | 111.11  | — | 27.78 |
| J1 | —    | 1142.86 | 715.29 | —    | 1142.86 | — | 1.43  |

Table S4. Group abundance (ind. m<sup>-3</sup>) at each station in autumn

| Station | Chaetognatha | Cladocera | Copepoda | Hydromedusa | Pelagic larvae | Polychaeta | Others  |
|---------|--------------|-----------|----------|-------------|----------------|------------|---------|
| B1      | 34.00        | 200.00    | 5007.00  | 109.00      | —              | 500.00     | 1611.00 |
| B2      | 125.00       | —         | 5751.88  | 1.88        | 312.50         | —          | 375.63  |
| B3      | 41.15        | —         | 5432.69  | 2.69        | 308.85         | —          | 77.31   |
| B5      | 160.00       | 230.77    | 462.31   | 425.77      | 3617.31        | 115.38     | 696.15  |
| B6      | 58.16        | —         | 1582.89  | 0.53        | 131.84         | 26.84      | 0.26    |
| B7      | 319.55       | —         | 3504.09  | 48.64       | 318.64         | 90.91      | 45.45   |
| B10     | 191.43       | —         | 3147.14  | —           | 71.43          | 0.71       | 285.71  |
| B11     | 130.00       | —         | 7607.00  | 152.00      | 1050.00        | —          | —       |
| B12     | 30.83        | 166.67    | 1860.00  | 0.83        | —              | 83.33      | 170.83  |
| B13     | 28.33        | —         | 1227.50  | 55.56       | 166.67         | 0.28       | —       |
| B14     | 57.73        | —         | 318.18   | 0.45        | 1545.45        | 45.45      | 90.91   |
| B15     | 81.11        | —         | 1648.70  | 55.56       | 277.78         | 18.70      | —       |
| B16     | 88.00        | —         | 1806.67  | —           | 669.33         | 0.67       | —       |
| B17     | 10.00        | —         | 1510.00  | —           | 333.33         | —          | 1.67    |
| B18     | 44.39        | —         | 637.27   | 0.15        | 1805.15        | 30.30      | —       |
| B19     | 17.78        | —         | 467.33   | —           | 200.00         | —          | —       |
| H1      | 5.00         | 1600.00   | 7702.00  | —           | 1400.00        | —          | 100.00  |
| H5      | 4.47         | 26.58     | 580.53   | —           | 106.84         | —          | 0.79    |
| J1      | 10.77        | 770.00    | 6776.15  | 63.85       | 396.92         | 0.77       | 30.77   |

Table S5. Abundance (ind. m<sup>-3</sup>) of dominant species at each station in summer

| Station | <i>Paracalanus parvus</i> | <i>Sagitta crassa</i> | <i>Oikopirura dioica</i> | <i>Pleurobrachia globosa</i> | <i>Pseudevadne tergestina</i> | <i>Penilia avirostris</i> |
|---------|---------------------------|-----------------------|--------------------------|------------------------------|-------------------------------|---------------------------|
| B1      | —                         | 155.00                | —                        | —                            | —                             | —                         |
| B2      | 144.50                    | 168.00                | —                        | —                            | —                             | —                         |
| B4      | 166.67                    | 61.67                 | 1944.44                  | 388.89                       | —                             | —                         |
| B5      | 385.38                    | 159.62                | 696.15                   | 386.15                       | 153.85                        | 76.92                     |
| B6      | 3547.89                   | 261.32                | 375.00                   | 143.68                       | 6264.21                       | 4664.47                   |
| B8      | —                         | 139.55                | —                        | 1.36                         | 45.45                         | 45.45                     |
| B9      | 300.00                    | 141.00                | —                        | 45.50                        | —                             | —                         |
| B10     | 600.00                    | 326.00                | —                        | 102.00                       | —                             | —                         |
| B11     | 4003.89                   | 479.44                | 333.33                   | 5.00                         | 111.11                        | —                         |
| B12     | 0.71                      | 0.71                  | 1230.00                  | —                            | —                             | —                         |
| B14     | —                         | 1.36                  | 90.91                    | 0.45                         | —                             | —                         |
| B16     | 3833.33                   | 105.83                | 83.33                    | 26.67                        | —                             | —                         |
| B17     | 2250.00                   | 70.36                 | —                        | 4.29                         | 35.71                         | —                         |
| B19     | 2900.68                   | 83.41                 | 68.18                    | 91.82                        | 228.64                        | 204.55                    |
| H2      | —                         | 1.25                  | —                        | 251.56                       | —                             | —                         |
| H4      | 55.56                     | 6.11                  | 111.11                   | —                            | —                             | —                         |
| J1      | 142.86                    | —                     | —                        | —                            | 1142.86                       | —                         |

Table S6. Abundance (ind. m<sup>-3</sup>) of dominant species at each station in autumn

| Station | <i>Paracalanus parvus</i> | <i>Sagitta crassa</i> | <i>Oikopirura dioica</i> | <i>Calanus sinicus</i> | <i>Cotycaeus affinis</i> | <i>Oithona similis</i> |
|---------|---------------------------|-----------------------|--------------------------|------------------------|--------------------------|------------------------|
| B1      | 2700.00                   | 30.00                 | 1611.00                  | 400.00                 | 1600.00                  | 100.00                 |

|     |         |        |        |        |         |         |
|-----|---------|--------|--------|--------|---------|---------|
| B2  | 1875.63 | 117.50 | 375.00 | —      | 2063.75 | 62.50   |
| B3  | 2813.46 | 38.46  | 76.92  | 538.85 | 1693.85 | 385.77  |
| B5  | 385.38  | 160.00 | 696.15 | —      | —       | —       |
| B6  | 342.89  | 55.26  | 100.00 | 606.58 | 396.32  | 78.95   |
| B7  | 2365.91 | 265.45 | 45.45  | 90.91  | 956.36  | 45.45   |
| B10 | 1575.00 | 180.71 | 142.86 | 71.43  | 1500.71 | —       |
| B11 | 6606.00 | 123.00 | —      | —      | 901.00  | —       |
| B12 | 1690.00 | 30.83  | 170.83 | —      | 170.00  | —       |
| B13 | 333.61  | 21.67  | —      | 225.00 | 56.11   | 27.78   |
| B14 | 90.91   | 55.45  | 90.91  | 45.45  | —       | 90.91   |
| B15 | 759.26  | 75.19  | —      | 37.04  | 574.63  | —       |
| B16 | 804.67  | 80.00  | —      | —      | 535.33  | 133.33  |
| B17 | 510.00  | 10.00  | 1.67   | —      | 333.33  | —       |
| B18 | 333.48  | 40.30  | —      | 45.76  | 197.42  | —       |
| B19 | 178.22  | 8.67   | —      | 44.44  | 200.22  | 22.22   |
| H1  | 200.00  | 4.00   | —      | —      | —       | 1500.00 |
| H5  | 289.47  | 4.21   | 0.26   | —      | 0.26    | 184.21  |
| J1  | —       | 10.77  | —      | —      | —       | —       |
